# Supplementary material
Source: HighWire-hosted journal article supplement (https://jnm.snmjournals.org/highwire/filestream/109590/field_highwire_adjunct_files/0/263598_Supplemental_Data_List_of_features_-_Radiomix_toolbox.pdf)
Supplement: 263598_Supplemental_Data_List_of_features_-_Radiomix_toolbox.pdf [file 263598_Supplemental_Data_List_of_features_-_Radiomix_toolbox.pdf]

# List of features. Radiomix toolbox

# Definition of RadiomiX features

## ***First-order gray-level statistics***

First-order gray-level statistics describe the distribution of gray-values within the volume. Let  $X$  denote the three dimensional image matrix with  $N$  voxels,  $P$  the first order histogram,  $P(i)$  the fraction of voxels with intensity level  $i$  and  $N_i$  the number of discrete intensity levels.

### **1. Energy**

$$energy = \sum_{i=1}^N X(i)^2$$

Energy is also known as the sum of squares.

### **2. Entropy**

$$entropy = \sum_{i=1}^{N_i} P(i) \log_2 P(i)$$

### **3. Kurtosis**

$$kurtosis = \frac{\frac{1}{N} \sum_{i=1}^N (X(i) - \bar{X})^4}{\left(\frac{1}{N} \sum_{i=1}^N (X(i) - \bar{X})^2\right)^2}$$

where  $\bar{X}$  is the mean of  $X$ .

### **4. Maximum**

The maximum intensity value of  $X$ .

$$maximum = \max(X)$$

### **5. Mean**

The mean gray-value of  $X$ .

$$mean = \frac{1}{N} \sum_{i=1}^N X(i)$$

## 6. Mean absolute deviation

The mean of the absolute deviations of all voxel intensities around the mean intensity value.

$$\text{mean absolute deviation} = \frac{1}{N} \sum_{i=1}^N |X(i) - \bar{X}|$$

where  $\bar{X}$  is the mean of  $X$ .

## 7. Median

The sample median of  $X$ , or the 50<sup>th</sup> percentile of  $X$ .

## 8. Minimum

The minimum intensity value of  $X$ .

$$\text{minimum} = \min(X)$$

## 9. Range

The range of intensity values of  $X$ .

$$\text{range} = \max(X) - \min(X)$$

## 10. Root mean square (RMS)

The quadratic mean, or the square root of the mean of squares of all voxel intensities.

$$\text{RMS} = \sqrt{\frac{\sum_i^N X(i)^2}{N}}$$

## 11. Skewness

$$\text{skewness} = \frac{\frac{1}{N} \sum_{i=1}^N (X(i) - \bar{X})^3}{\left( \sqrt{\frac{1}{N} \sum_{i=1}^N (X(i) - \bar{X})^2} \right)^3}$$

where  $\bar{X}$  is the mean of  $X$ .

## 12. Standard deviation

$$\text{standard deviation} = \left( \frac{1}{N-1} \sum_{i=1}^N (X(i) - \bar{X})^2 \right)^{1/2}$$

where  $\bar{X}$  is the mean of  $X$ .

**13. Robust mean absolute deviation**

The mean absolute deviation (0) of only those voxels in  $X$  with a gray-value between the 10<sup>th</sup> and 90<sup>th</sup> percentile.

**14. 10<sup>th</sup> percentile**

The 10<sup>th</sup> percentile of  $X$ , a robust alternative to the minimum gray-value (8).

**15. 90<sup>th</sup> percentile**

The 90<sup>th</sup> percentile of  $X$ , a robust alternative to the maximum gray-value (4).

**16. Interquartile range**

The interquartile range is defined as the 75<sup>th</sup> minus the 25<sup>th</sup> percentile of  $X$ .

**17. Uniformity**

$$uniformity = \sum_{i=1}^{N_l} P(i)^2$$

**18. Variance**

$$variance = \frac{1}{N-1} \sum_{i=1}^N (X(i) - \bar{X})^2$$

where  $\bar{X}$  is the mean of  $X$ . Variance is the square of the standard deviation (12).

## ***Fractal Dimension features (FD)***

Given the FD processed image  $I$ , with  $N$  elements:

**19. Average:**

$$average = \frac{1}{N} \sum I$$

**20. Lacunarity**

$$lacunarity = \frac{\frac{1}{N} \sum I^2}{\frac{1}{N^2} \sum I} - 1$$

**21. Standard deviation:**

$$standard\ deviation = \left( \frac{1}{N-1} \sum (I - \bar{I})^2 \right)^{1/2}$$

Where  $\bar{I}$  is the mean of  $I$ .

## **Geometric features**

Geometric features describe the shape and size of the volume of interest. Let  $V$  be the volume and  $A$  the surface area of the volume of interest. Let  $N$  be the total number of voxels,  $X = \{\vec{X}_1, \vec{X}_2, \dots, \vec{X}_N\}$  the set of  $N$  Cartesian coordinate vectors and  $I = \{I_1, I_2, \dots, I_N\}$  the corresponding intensity values.

### **22. Asphericity**

$$asphericity = \left( \frac{1}{36\pi} \frac{A^3}{V^2} \right)^{\frac{1}{3}} - 1$$

### **23. Centroid distance**

The centroid distance is the Euclidean distance between the geometric centroid ( $C_g$ ) and the centroid weighing each voxel by its intensity value ( $C_i$ ). The centroid distance is a measure of how close the high intensity values are to the geometric center.

$$C_g = \frac{1}{N} \sum_{i=1}^N \vec{X}_i$$

$$C_i = \frac{\sum_{i=1}^N I \vec{X}_i}{\sum_{i=1}^N I}$$

$$centroid\ distance = \|C_g - C_i\|$$

### **24. Compactness 1**

Compactness is a measure of how much the volume resembles a sphere.

$$compactness\ 1 = \frac{V}{\sqrt{\pi} A^{\frac{2}{3}}}$$

### **25. Compactness 2**

$$compactness\ 2 = 36\pi \frac{V^2}{A^3}$$

### **26. Compactness 3**

$$compactness\ 3 = \frac{V}{\sqrt{\pi} A^{\frac{3}{2}}}$$

## 27. Maximum diameter

The maximum diameter is the largest pairwise difference between voxels on the surface of the volume, in 3D and for each plane separately. The following diameters are calculated:

27.1. The maximum three-dimensional tumor diameter.

27.2. The maximum two-dimensional diameter of all transversal planes.

27.3. The maximum two-dimensional diameter of all sagittal planes.

27.4. The maximum two-dimensional diameter of all coronal planes.

## 28. Major axis length

Axis lengths are measures of the extent of the volume along its three principle axis. Principle component analysis (PCA) on the x, y and z coordinates of all voxels within the volume is used to determine the three orthogonal eigenvectors and corresponding eigenvalues ( $\lambda_{max}$ ,  $\lambda_{minor}$ ,  $\lambda_{min}$ ). The major axis length is the largest eigenvalue ( $\lambda_{max}$ ) as determined by PCA.

## 29. Minor axis length

The largest eigenvalue ( $\lambda_{minor}$ ) as determined by PCA.

## 30. Least axis length

The smallest eigenvalue ( $\lambda_{min}$ ) as determined by PCA.

## 31. Elongation

$$elongation = \frac{\lambda_{minor}}{\lambda_{max}}$$

## 32. Flatness

$$flatness = \frac{\lambda_{min}}{\lambda_{max}}$$

### 33. Spherical disproportion

Spherical disproportion is a measure of how much the volume resembles a sphere.

$$\text{spherical disproportion} = \frac{A}{4\pi R^2}$$

Where  $A$  is the surface area and  $R$  is the radius of a sphere with the same volume as the tumor, obtained through:

$$R = \sqrt[3]{\frac{3V}{4\pi}}$$

### 34. Sphericity

Sphericity is a measure of how much the volume resembles a sphere.

$$\text{sphericity} = \frac{\pi^{\frac{1}{3}}(6V)^{\frac{2}{3}}}{A} = \frac{(36\pi V^2)^{\frac{1}{3}}}{A}$$

### 35. Surface area

The surface area is calculated by triangulation (i.e. dividing the surface into connected triangles, which define the isosurface enclosing the volume) and is defined as:

$$\text{surface area} = \sum_{i=1}^N \frac{1}{2} |a_i b_i \times a_i c_i|$$

Where  $N$  is the total number of triangles covering the surface and  $a$ ,  $b$  and  $c$  are edge vectors of the triangles.

### 36. Surface to volume ratio

$$\text{surface to volume ratio} = \frac{A}{V}$$

### 37. Volume

The volume is defined as the number of voxels within the volume multiplied by the voxel volume.

$$\text{volume} = Nv$$

Where  $v$  is the volume of a single voxel.

## Gray-Level Co-Occurrence Matrix based features (GCLM)

A normalized GLCM is defined as  $P(i, j; \delta, \alpha)$ , a matrix with size  $N_g \times N_g$  describing the second-order joint probability function of an image, where the  $(i, j)$ th element represents the number of times the combination of intensity levels  $i$  and  $j$  occur in two pixels in the image, that are separated by a distance of  $\delta$  pixels in direction  $\alpha$ , and  $N_g$  is the maximum discrete intensity level in the image. Let:  $P(i, j)$  be the normalized (i.e.  $\sum P(i, j) = 1$ ) co-occurrence matrix, generalized for any  $\delta$  and  $\alpha$ ,

$$p_x(i) = \sum_{j=1}^{N_g} P(i, j),$$

$$p_y(j) = \sum_{i=1}^{N_g} P(i, j),$$

$$\mu_x \text{ be the mean of } p_x, \text{ where } \mu_x = \sum_{i=1}^{N_g} \sum_{j=1}^{N_g} iP(i, j)$$

$$\mu_y \text{ be the mean of } p_y, \text{ where } \mu_y = \sum_{i=1}^{N_g} \sum_{j=1}^{N_g} jP(i, j)$$

$$\sigma_x \text{ be the standard deviation of } p_x, \text{ where } \sigma_x^2 = \sum_{i=1}^{N_g} \sum_{j=1}^{N_g} P(i, j)(i - \mu_x)^2$$

$$\sigma_y \text{ be the standard deviation of } p_y, \text{ where } \sigma_y^2 = \sum_{i=1}^{N_g} \sum_{j=1}^{N_g} P(i, j)(j - \mu_y)^2$$

$$p_{x+y}(k) = \sum_{i=1}^{N_g} \sum_{j=1}^{N_g} P(i, j), i + j = k, k = 2, 3, \dots, 2N_g,$$

$$p_{x-y}(k) = \sum_{i=1}^{N_g} \sum_{j=1}^{N_g} P(i, j), |i - j| = k, k = 0, 1, \dots, N_g - 1,$$

$$HXY1 = - \sum_{i=1}^{N_g} \sum_{j=1}^{N_g} P(i, j) \ln(p_x(i)p_y(j)),$$

$$HXY2 = - \sum_{i=1}^{N_g} \sum_{j=1}^{N_g} p_x(i)p_y(j) \ln(p_x(i)p_y(j)),$$

$$HX = - \sum p_x \ln(p_x)$$

$$HY = - \sum p_y \ln(p_y)$$

### 38. Average ( $\mu$ )

$$\text{average } (\mu) = \frac{\sum_{i=1}^{N_g} \sum_{j=1}^{N_g} (i + j)P(i, j)}{2}$$

Note that for a symmetrical GLCM,  $\mu = \mu_x = \mu_y$ .

39. **Autocorrelation**

$$\text{autocorrelation} = \sum_{i=1}^{N_g} \sum_{j=1}^{N_g} ijP(i, j)$$

40. **Cluster Prominence**

$$\text{cluster prominence} = \sum_{i=1}^{N_g} \sum_{j=1}^{N_g} [i + j - \mu_x - \mu_y]^4 P(i, j)$$

41. **Cluster Shade**

$$\text{cluster shade} = \sum_{i=1}^{N_g} \sum_{j=1}^{N_g} [i + j - \mu_x - \mu_y]^3 P(i, j)$$

42. **Cluster Tendency**

$$\text{cluster tendency} = \sum_{i=1}^{N_g} \sum_{j=1}^{N_g} [i + j - \mu_x - \mu_y]^2 P(i, j)$$

43. **Contrast**

$$\text{contrast} = \sum_{i=1}^{N_g} \sum_{j=1}^{N_g} |i - j|^2 P(i, j) = \sum_{k=0}^{N_g-1} k^2 p_{x-y}(k)$$

44. **Correlation**

$$\text{correlation} = \frac{\sum_{i=1}^{N_g} \sum_{j=1}^{N_g} ijP(i, j) - \mu_x \mu_y}{\sigma_x \sigma_y}$$

45. **Difference Average ( $\mu_{x-y}$ )**

$$\text{difference average } (\mu_{x-y}) = \sum_{k=0}^{N_g-1} k p_{x-y}(k)$$

46. **Difference Entropy**

$$\text{difference entropy} = - \sum_{i=0}^{N_g-1} P_{x-y}(i) \log_2 [P_{x-y}(i)]$$

**47. Difference Variance**

$$\text{difference variance} = \sum_{i=0}^{N_g-1} (i - \mu_{x-y})^2 P_{x-y}(i)$$

**48. Dissimilarity**

$$\text{dissimilarity} = \sum_{i=1}^{N_g} \sum_{j=1}^{N_g} |i - j| P(i, j)$$

**49. Energy**

$$\text{energy} = \sum_{i=1}^{N_g} \sum_{j=1}^{N_g} [P(i, j)]^2$$

This feature is also called Angular Second Moment (ASM) and Uniformity.

**50. Entropy (H)**

$$\text{entropy (H)} = - \sum_{i=1}^{N_g} \sum_{j=1}^{N_g} P(i, j) \log_2[P(i, j)]$$

**51. Homogeneity 1**

$$\text{homogeneity 1} = \sum_{i=1}^{N_g} \sum_{j=1}^{N_g} \frac{P(i, j)}{1 + |i - j|}$$

This feature is also called Inverse Difference.

**52. Homogeneity 2**

$$\text{homogeneity 2} = \sum_{i=1}^{N_g} \sum_{j=1}^{N_g} \frac{P(i, j)}{1 + |i - j|^2}$$

This feature is also called Inverse Difference Moment.

**53. Informational measure of correlation 1 (IMC1)**

$$\text{IMC1} = \frac{H - H_{XY1}}{\max\{H_X, H_Y\}}$$

Where  $H$  is the entropy (50).

**54. Informational measure of correlation 2 (IMC2)**

$$IMC2 = \sqrt{1 - e^{-2(HXY2-H)}}$$

Where  $H$  is the entropy (50).

**55. Inverse Difference Moment Normalized (IDMN)**

$$IDMN = \sum_{i=1}^{N_g} \sum_{j=1}^{N_g} \frac{P(i,j)}{1 + \left(\frac{|i-j|^2}{N_g^2}\right)}$$

**56. Inverse Difference Normalized (IDN)**

$$IDN = \sum_{i=1}^{N_g} \sum_{j=1}^{N_g} \frac{P(i,j)}{1 + \left(\frac{|i-j|}{N_g}\right)}$$

**57. Inverse variance**

$$inverse\ variance = \sum_{i=1}^{N_g} \sum_{j=1}^{N_g} \frac{P(i,j)}{|i-j|^2}, i \neq j$$

**58. Maximal Correlation Coefficient**

$$maximal\ correlation\ coefficient = \sqrt{\text{second largest eigenvalue of } Q}$$

$$Q = \sum_{k=1}^{N_g} \frac{P(i,k)P(j,k)}{p_x(i)p_y(k)}$$

**59. Maximum Probability**

$$maximum\ probability = \max\{P(i,j)\}$$

**60. Sum average (SA)**

$$sum\ average\ (SA) = \sum_{i=2}^{2N_g} [iP_{x+y}(i)]$$

**61. Sum entropy**

$$sum\ entropy = - \sum_{i=2}^{2N_g} P_{x+y}(i) \log_2 [P_{x+y}(i)]$$

**62. Sum variance**

$$\text{sum variance} = \sum_{i=2}^{2N_g} (i - SA)^2 P_{x+y}(i)$$

**63. Variance (sum of squares)**

$$\text{variance} = \sum_{i=1}^{N_g} \sum_{j=1}^{N_g} (i - \mu)^2 P(i, j)$$

## **Gray-Level Run-Length matrix based features (GLRLM)**

Run length metrics quantify gray level runs in an image. A gray level run is defined as the length in number of pixels, of consecutive pixels that have the same gray level value. In a gray level run length matrix  $p(i, j|\theta)$ , the  $(i, j)$ th element describes the number of times  $j$  a gray level  $i$  appears consecutively in the direction specified by  $\theta$ . Let:

$p(i, j)$  be the  $(i, j)$ th entry in the given run-length matrix  $p$ , generalized for any direction  $\theta$ ,

$N_g$  the number of discrete intensity values in the image,

$N_r$  the maximum run length,

$N_s$  the total number of runs, where  $N_s = \sum_{i=1}^{N_g} \sum_{j=1}^{N_r} p(i, j)$ ,

$p_r$  the sum distribution of the number of runs with run length  $j$ , where  $p_r(j) = \sum_{i=1}^{N_g} p(i, j)$ ,

$p_g$  the sum distribution of the number of runs with gray level  $i$ , where  $p_g(i) = \sum_{j=1}^{N_r} p(i, j)$ ,

$N_p$  the number of voxels in the image, where  $N_p = \sum_{j=1}^{N_r} j p_r$ ,

$p_n(i, j)$  the normalized run-length matrix, where  $p_n(i, j) = \frac{p(i, j)}{N_s}$ ,

$\mu_r$  the mean run length, where  $\mu_r = \sum_{i=1}^{N_g} \sum_{j=1}^{N_r} j p_n(i, j)$ ,

$\mu_g$  the mean gray level, where  $\mu_g = \sum_{i=1}^{N_g} \sum_{j=1}^{N_r} i p_n(i, j)$ .

### **64. Short Run Emphasis (SRE)**

$$SRE = \frac{1}{N_s} \sum_{j=1}^{N_r} \frac{p_r}{j^2}$$

### **65. Long Run Emphasis (LRE)**

$$LRE = \frac{1}{N_s} \sum_{j=1}^{N_r} j^2 p_r$$

### **66. Gray Level Non-Uniformity (GLN)**

$$GLN = \frac{1}{N_s} \sum_{i=1}^{N_g} p_g^2$$

**67. Gray Level Non-Uniformity Normalized (GLNN)**

$$GLNN = \frac{1}{N_s^2} \sum_{i=1}^{N_g} p_g^2$$

**68. Run Length Non-Uniformity (RLN)**

$$RLN = \frac{1}{N_s} \sum_{j=1}^{N_r} p_r^2$$

**69. Run Length Non-Uniformity Normalized (RLNN)**

$$RLNN = \frac{1}{N_s^2} \sum_{j=1}^{N_r} p_r^2$$

**70. Run Percentage (RP)**

$$RP = \frac{N_s}{N_p}$$

**71. Low Gray Level Run Emphasis (LGRE)**

$$LGRE = \frac{1}{N_s} \sum_{i=1}^{N_g} \frac{p_g}{i^2}$$

**72. High Gray Level Run Emphasis (HGRE)**

$$HGRE = \frac{1}{N_s} \sum_{i=1}^{N_g} i^2 p_g$$

**73. Short Run Low Gray Level Emphasis (SRLGE)**

$$SRLGE = \frac{1}{N_s} \sum_{i=1}^{N_g} \sum_{j=1}^{N_r} \frac{p(i,j)}{i^2 j^2}$$

**74. Short Run High Gray Level Emphasis (SRHGE)**

$$SRHGE = \frac{1}{N_s} \sum_{i=1}^{N_g} \sum_{j=1}^{N_r} \frac{p(i,j) i^2}{j^2}$$

**75. Long Run Low Gray Level Emphasis (LRLGE)**

$$LRLGE = \frac{1}{N_s} \sum_{i=1}^{N_g} \sum_{j=1}^{N_r} \frac{p(i,j) j^2}{i^2}$$

**76. Long Run High Gray Level Emphasis (LRHGE)**

$$LRHGE = \frac{1}{N_s} \sum_{i=1}^{N_g} \sum_{j=1}^{N_r} p(i,j) i^2 j^2$$

**77. Gray level variance (GLV)**

$$GLV = \sum_{i=1}^{N_g} \sum_{j=1}^{N_r} (i - \mu_g)^2 p_n(i,j)$$

**78. Run length variance (RLV)**

$$RLV = \sum_{i=1}^{N_g} \sum_{j=1}^{N_r} (j - \mu_r)^2 p_n(i,j)$$

**79. Run entropy (RE)**

$$RE = - \sum_{i=1}^{N_g} \sum_{j=1}^{N_r} p_n(i,j|\theta) \log_2 [p_n(i,j)]$$

## **Gray-Level size-zone matrix based features (GLSZM)**

A gray level size-zone matrix describes the amount of homogeneous connected areas within the volume, of a certain size and intensity. The  $(i, j)$ th entry of the GLSZM  $p(i, j)$  is the number of connected areas of gray-level (i.e. intensity value)  $i$  and size  $j$ . GLSZM features therefore describe homogeneous areas within the tumor volume, describing tumor heterogeneity at a regional scale.

Let:

$p(i, j)$  be the  $(i, j)$ th entry in the given GLSZM  $p$ ,

$N_g$  the number of discrete intensity values in the image,

$N_z$  the size of the largest, homogeneous region in the volume of interest,

$N_s$  the total number of homogeneous regions (zones), where  $N_s = \sum_{i=1}^{N_g} \sum_{j=1}^{N_z} p(i, j)$ ,

$p_z$  the sum distribution of the number of zones with size  $j$ , where  $p_z(j) = \sum_{i=1}^{N_g} p(i, j)$ ,

$p_g$  the sum distribution of the number of zones with gray level  $i$ , where  $p_g(i) = \sum_{j=1}^{N_z} p(i, j)$ ,

$N_p$  the number of voxels in the image, where  $N_p = \sum_{j=1}^{N_z} j p_z$ ,

$p_n(i, j)$  the normalized size-zone matrix, where  $p_n(i, j) = \frac{p(i, j)}{N_s}$ ,

$\mu_z$  the mean zone size, where  $\mu_z = \sum_{i=1}^{N_g} \sum_{j=1}^{N_z} j p_n(i, j | \theta)$ ,

$\mu_g$  the mean gray level, where  $\mu_g = \sum_{i=1}^{N_g} \sum_{j=1}^{N_z} i p_n(i, j | \theta)$ .

### **80. Small area Emphasis (SAE)**

$$SAE = \frac{1}{N_s} \sum_{j=1}^{N_z} \frac{p_z}{j^2}$$

### **81. Large area Emphasis (LAE)**

$$LAE = \frac{1}{N_s} \sum_{j=1}^{N_z} j^2 p_z$$

### **82. Intensity Non-Uniformity (IN)**

$$IN = \frac{1}{N_s} \sum_{i=1}^{N_g} p_g^2$$

**83. Intensity Non-Uniformity Normalized (INN)**

$$INN = \frac{1}{N_s^2} \sum_{i=1}^{N_g} p_g^2$$

**84. Size-zone Non-Uniformity (SZN)**

$$SZN = \frac{1}{N_s} \sum_{j=1}^{N_z} p_z^2$$

**85. Size-zone Non-Uniformity Normalized (SZNN)**

$$SZNN = \frac{1}{N_s^2} \sum_{j=1}^{N_z} p_z^2$$

**86. Zone Percentage (ZP)**

$$ZP = \frac{N_s}{N_p}$$

**87. Low intensity Emphasis (LIE)**

$$LIE = \frac{1}{N_s} \sum_{i=1}^{N_g} \frac{p_g}{i^2}$$

**88. High intensity Emphasis (HIE)**

$$HIE = \frac{1}{N_s} \sum_{i=1}^{N_g} i^2 p_g$$

**89. Low intensity small area Emphasis (LISAE)**

$$LISAE = \frac{1}{N_s} \sum_{i=1}^{N_g} \sum_{j=1}^{N_z} \frac{p(i,j)}{i^2 j^2}$$

**90. High intensity small area Emphasis (HISAE)**

$$HISAE = \frac{1}{N_s} \sum_{i=1}^{N_g} \sum_{j=1}^{N_z} \frac{p(i,j) i^2}{j^2}$$

**91. Low intensity large area Emphasis (LILAE)**

$$LILAE = \frac{1}{N_s} \sum_{i=1}^{N_g} \sum_{j=1}^{N_z} \frac{p(i,j) j^2}{i^2}$$

**92. High intensity large area Emphasis (HILAE)**

$$HILAE = \frac{1}{N_s} \sum_{i=1}^{N_g} \sum_{j=1}^{N_z} p(i,j) i^2 j^2$$

**93. Intensity variance (IV)**

$$IV = \sum_{i=1}^{N_g} \sum_{j=1}^{N_z} (i - \mu_g)^2 p_n(i,j)$$

**94. Size-zone variance (SZV)**

$$SZV = \sum_{i=1}^{N_g} \sum_{j=1}^{N_z} (j - \mu_z)^2 p_n(i,j)$$

**95. Zone entropy (ZE)**

$$ZE = - \sum_{i=1}^{N_g} \sum_{j=1}^{N_z} p_n(i,j) \log_2 [p_n(i,j)]$$

## **Gray-Level distance-zone matrix based features (GLDZM)**

A gray level distance-zone matrix describes the amount of homogeneous connected areas within the volume, of a certain intensity and distance to the shape border. The shape border is defined by 6-connectedness in 3D (i.e. a voxel is on the border, if at least one face is exposed). Here, the minimum distance to the border is 1 (i.e. voxels on the border have a distance of 1), to allow for correct feature calculations. The  $(i, j)$ th entry of the GLDZM  $p(i, j)$  is the number of connected areas of gray-level (i.e. intensity value)  $i$  and minimum distance  $j$  to the shape border. GLSZM features therefore describe the radial distribution of homogeneous areas within the tumor volume. Let:

$p(i, j)$  be the  $(i, j)$ th entry in the given GLDZM  $p$ ,

$N_g$  the number of discrete intensity values in the image,

$N_d$  the largest distance of a homogeneous region in the volume of interest to the shape border,

$N_s$  the total number of homogeneous regions (zones), where  $N_s = \sum_{i=1}^{N_g} \sum_{j=1}^{N_d} p(i, j)$ ,

$p_d$  the sum distribution of the number of zones with distance  $j$ , where  $p_z(j) = \sum_{i=1}^{N_g} p(i, j)$ ,

$p_g$  the sum distribution of the number of zones with gray level  $i$ , where  $p_g(i) = \sum_{j=1}^{N_d} p(i, j)$ ,

$N_p$  the number of voxels in the image, where  $N_p = \sum_{j=1}^{N_d} j p_d$ ,

$p_n(i, j)$  the normalized size-zone matrix, where  $p_n(i, j) = \frac{p(i, j)}{N_s}$ ,

$\mu_d$  the mean distance, where  $\mu_d = \sum_{i=1}^{N_g} \sum_{j=1}^{N_d} j p_n(i, j | \theta)$ ,

$\mu_g$  the mean gray level, where  $\mu_g = \sum_{i=1}^{N_g} \sum_{j=1}^{N_d} i p_n(i, j | \theta)$ .

### **96. Small distance Emphasis (SDE)**

$$SDE = \frac{1}{N_s} \sum_{j=1}^{N_d} \frac{p_d}{j^2}$$

**97. Large distance Emphasis (LDE)**

$$LDE = \frac{1}{N_s} \sum_{j=1}^{N_d} j^2 p_d$$

**98. Intensity Non-Uniformity (IN)**

$$IN = \frac{1}{N_s} \sum_{i=1}^{N_g} p_g^2$$

**99. Intensity Non-Uniformity Normalized (INN)**

$$INN = \frac{1}{N_s^2} \sum_{i=1}^{N_g} p_g^2$$

**100. Distance-zone Non-Uniformity (DZN)**

$$DZN = \frac{1}{N_s} \sum_{j=1}^{N_d} p_d^2$$

**101. Distance-zone Non-Uniformity Normalized (DZNN)**

$$DZNN = \frac{1}{N_s^2} \sum_{j=1}^{N_d} p_d^2$$

**102. Zone Percentage (ZP)**

$$ZP = \frac{N_s}{N_p}$$

**103. Low intensity Emphasis (LIE)**

$$LIE = \frac{1}{N_s} \sum_{i=1}^{N_g} \frac{p_g}{i^2}$$

**104. High intensity Emphasis (HIE)**

$$HIE = \frac{1}{N_s} \sum_{i=1}^{N_g} i^2 p_g$$

**105. Low intensity small distance Emphasis (LISDE)**

$$LISAE = \frac{1}{N_s} \sum_{i=1}^{N_g} \sum_{j=1}^{N_d} \frac{p(i,j)}{i^2 j^2}$$

**106. High intensity small distance Emphasis (HISDE)**

$$HISAE = \frac{1}{N_s} \sum_{i=1}^{N_g} \sum_{j=1}^{N_d} \frac{p(i,j)i^2}{j^2}$$

**107. Low intensity large distance Emphasis (LILDE)**

$$LILAE = \frac{1}{N_s} \sum_{i=1}^{N_g} \sum_{j=1}^{N_d} \frac{p(i,j)j^2}{i^2}$$

**108. High intensity large distance Emphasis (HILDE)**

$$HILAE = \frac{1}{N_s} \sum_{i=1}^{N_g} \sum_{j=1}^{N_d} p(i,j)i^2j^2$$

**109. Intensity variance (IV)**

$$IV = \sum_{i=1}^{N_g} \sum_{j=1}^{N_d} (i - \mu_g)^2 p_n(i,j)$$

**110. Distance-zone variance (DZV)**

$$SZV = \sum_{i=1}^{N_g} \sum_{j=1}^{N_d} (j - \mu_d)^2 p_n(i,j)$$

**111. Distance-zone entropy (DZE)**

$$DZE = - \sum_{i=1}^{N_g} \sum_{j=1}^{N_d} p_n(i,j) \log_2 [p_n(i,j)]$$

## ***Intensity histogram features***

Intensity histogram features describe the distribution of grey values within the volume, after discretization into intensity level bins was applied. Let:

$X_d = \{X_{d,1}, X_{d,2}, \dots, X_{d,N_v}\}$  be the set of discretized intensity values of the  $N_v$  voxels in the volume of interest,

$H = \{n_1, n_2, \dots\}$  be the histogram with frequency count  $n_i$  of each discretized intensity level  $i$  in  $X_d$ ,

$N_g$  be the number of discretized intensity values (bins) in the volume of interest,

$p_i$  be the occurrence probability for each bin  $i$  of the histogram  $N_g$ , where  $p_i = n_i/N_v$ .

### **112. Coefficient of variance (cov)**

$$cov = \frac{\text{standard deviation}}{\text{mean}}$$

### **113. Energy**

$$energy = \sum_{j=1}^{N_v} X_d(j)^2$$

Energy is also known as the sum of squares.

### **114. Entropy**

$$entropy = - \sum_{i=1}^{N_g} P(i) \log_2 P(i)$$

### **115. Interquartile range (iqr)**

$$IQR = P_{75} - P_{25}$$

where  $P_{25}$  and  $P_{75}$  are the 25<sup>th</sup> and 75<sup>th</sup> percentile of  $X_d$ , respectively.

### **116. Kurtosis**

$$kurtosis = \frac{\frac{1}{N_v} \sum_{j=1}^{N_v} (X_d(j) - \bar{X}_d)^4}{\left(\frac{1}{N_v} \sum_{j=1}^{N_v} (X_d(j) - \bar{X}_d)^2\right)^2}$$

where  $\bar{X}_d$  is the mean of  $X_d$ .

#### 117. Maximum

The maximum discretized intensity value of  $X_d$ .

$$maximum = \max(X_d)$$

#### 118. Maximum histogram gradient (maxgrad)

$$maxgrad = \max(H')$$

Where  $H'$  is the histogram gradient, defined as:

$$H' = \{H(2) - H(1), \dots, \frac{H(i+1) - H(i-1)}{2}, \dots, H(N_g) - H(N_g - 1)\}$$

#### 119. Maximum histogram gradient intensity level (maxgradi)

The discretized intensity level  $i$  corresponding to the maximum histogram gradient.

#### 120. Mean

The mean discretized intensity value of  $X_d$ .

$$mean = \frac{1}{N_v} \sum_{j=1}^{N_v} X_d(j)$$

#### 121. Mean absolute deviation (meand)

The mean of the absolute deviations of all discretized intensity levels around the mean of  $X_d$ .

$$meand = \frac{1}{N_v} \sum_{j=1}^{N_v} |X_d(j) - \bar{X}_d|$$

where  $\bar{X}_d$  is the mean of  $X_d$ .

#### 122. Median

The sample median of  $X_d$  or the 50<sup>th</sup> percentile of  $X_d$ .

#### 123. Median absolute deviation (mediand)

The dispersion from the median of  $X_d$ .

$$mediand = \frac{1}{N_v} \sum_{j=1}^{N_v} |X_d(j) - M|$$

where  $M$  is the median of  $X_d$ .

#### 124. Minimum

The minimum discretized intensity value of  $X_d$ .

$$minimum = \min(X_d)$$

#### 125. Minimum histogram gradient (mingrad)

$$mingrad = \min(H')$$

Where  $H'$  is the histogram gradient, defined as:

$$H' = \{H(2) - H(1), \dots, \frac{H(i+1) - H(i-1)}{2}, \dots, H(N_g) - H(N_g - 1)\}$$

#### 126. Minimum histogram gradient intensity level (mingradi)

The discretized intensity level  $i$  corresponding to the minimum histogram gradient.

**127. Mode**

The mode of  $X_d$  is the most frequently occurring discretized image level present. In case multiple bins have the highest count  $n_i$ , the mode is the smallest of those values.

**128. Uniformity**

$$uniformity = \sum_{i=1}^{N_g} P(i)^2$$

**129. Range**

The range of bins in the histogram, i.e. the width of the histogram.

$$range = \max(X_d) - \min(X_d)$$

**130. Root mean square (RMS):**

$$RMS = \sqrt{\frac{\sum_{j=1}^{N_v} X_d(j)^2}{N_v}}$$

**131. Robust mean absolute deviation (rmeand)**

Similar to mean absolute deviation, but in this case only considering the set of intensity levels in the range between the 10<sup>th</sup> and 90<sup>th</sup> percentile of  $X_d$ .

$$rmeand = \frac{1}{N_{10-90}} \sum_{j=1}^{N_{10-90}} |X_{d,10-90}(j) - \bar{X}_{d,10-90}|$$

where  $X_{10-90}$  represents the set of  $N_{10-90}$  voxels in  $X_d$  whose discretized intensity levels fall within the range of the 10<sup>th</sup> till the 90<sup>th</sup> percentile of  $X_d$ .

**132. Skewness**

$$skewness = \frac{\frac{1}{N_v} \sum_{j=1}^{N_v} (X_d(j) - \bar{X}_d)^3}{\left( \sqrt{\frac{1}{N_v} \sum_{j=1}^{N_v} (X_d(j) - \bar{X}_d)^2} \right)^3}$$

**133. Standard deviation**

$$standard\ deviation = \left( \frac{1}{N_v - 1} \sum_{j=1}^{N_v} (X_d(j) - \bar{X}_d)^2 \right)^{1/2}$$

**134. Variance**

The variance of  $X_d$ .

$$variance = \frac{1}{N_v - 1} \sum_{j=1}^{N_v} (X_d(j) - \bar{X}_d)^2$$

where  $\bar{X}_d$  is the mean of  $X_d$ .

**135. 10<sup>th</sup> percentile**

The 10<sup>th</sup> percentile of  $X_d$ .

**136. 90<sup>th</sup> percentile**

The 90<sup>th</sup> percentile of  $X_d$ .

**137. Quartile coefficient of dispersion (qcod)**

The quartile coefficient of dispersion is a robust alternative to the coefficient of variance.

$$qcod = \frac{P_{75} - P_{25}}{P_{75} + P_{25}}$$

where  $P_{25}$  and  $P_{75}$  are the 25<sup>th</sup> and 75<sup>th</sup> percentile of  $X_d$ , respectively.

## ***Intensity volume histogram (IVH) features***

A set of metrics derived from intensity volume histogram (IVH) representations, which summarize the complex three dimensional (3D) data contained in the image into a single curve, allowing for a simplified interpretation. The following definitions of IVH features were used:

**138. *AVAI<sub>y</sub>***

Volume (AV) [ml] above (i.e. with at least) an intensity (AI)

**139. *RVAI<sub>y</sub>***

Relative volume (RV) [%] above (i.e. with at least) an intensity (AI)

**140. *AVRI<sub>x</sub>***

Volume (AV) [ml] above (i.e. with at least) a relative intensity (RI)

**141. *RVRI<sub>x</sub>***

Relative volume (RV) [%] above (i.e. with at least) a relative intensity (RI)

**142. *AIAV<sub>z</sub>***

Intensity thresholds (AI) [SUV] for the Z ml highest intensity volume (AV)

**143. *AIRV<sub>x</sub>***

Intensity thresholds (AI) [SUV] for the X% highest intensity volume (RV)

**144. *MIAV<sub>z</sub>***

Mean intensity (MI) [SUV] in the Z ml highest intensity volume (AV)

**145. *MIRV<sub>x</sub>***

Mean intensity (MI) [SUV] in the X% highest intensity volume (RV)

**146. *TLGAI<sub>y</sub>***

TLG for volume (TLG) above (i.e. with at least) an intensity (AI)

**147. *TLGRI<sub>x</sub>***

TLG for volume (TLG) above (i.e. with at least) a relative intensity (RI)

Relative steps in volume and intensity (**x**) are taken in 10% increments;  $X=\{10\%, 20\%, \dots, 90\%\}$ .

Absolute steps in intensity (**y**) are taken in absolute [SUV] increments, e.g. 0.5;  $Y=\{0.5, 1, \dots, SUV_{\max}\}$ , where  $SUV_{\max}$  is the maximum image intensity value. Absolute steps in volume (**z**) are taken in 0.5 ml increments;  $Z=\{0.5 \text{ ml}, 1 \text{ ml}, \dots, V\}$ , where V is the tumor volume.

## ***Local Intensity features***

Local Intensity (LocInt) features are defined based on local intensity values around a center voxel.

### **148. Local intensity peak**

Mean intensity level in a  $1 \text{ cm}^3$  spherical volume, centered on the voxel with the maximum intensity level in the volume of interest. In case multiple voxels contain the maximum intensity level, the highest mean intensity level of all spherical volumes is used.

### **149. Global Intensity peak**

Similar to local intensity peak, but in this case the mean intensity level in a  $1 \text{ cm}^3$  spherical volume is calculated for every voxel in the volume of interest. The highest mean intensity level of all spherical volumes is selected as the global intensity peak feature.

## **Neighborhood gray tone difference matrix based features (NGTDM)**

The  $i$ th entry of the NGTDM  $s(i|d)$  is the sum of gray level differences of voxels with intensity  $i$  and the average intensity  $A_i$  of their neighboring voxels within a distance  $d$ . Here, a complete neighborhood is not required and  $A_i$  is determined over the valid voxels.

Let:

$n_i$  be the number of voxels with gray level  $i$ ,

$N_v = \sum n_i$ , the total number of voxels,

$$s(i) = \begin{cases} \sum n_i |i - A_i| & \text{for } n_i > 0 \\ 0 & \text{otherwise} \end{cases}, \text{ generalized for any distance } d,$$

$N_g$  be the maximum discrete intensity level in the image,

$p(i) = \frac{n_i}{N_v}$ , the probability of gray level  $i$ ,

$N_p$ , the total number of gray levels present in the image.

### **150. Coarseness**

$$coarseness = \frac{1}{\varepsilon + \sum_{i=1}^{N_g} p(i)s(i)}$$

Where  $\varepsilon$  is a small number to prevent coarseness becoming infinite.

### **151. Contrast**

$$contrast = \left( \frac{1}{N_p(1 - N_p)} \sum_{i=1}^{N_g} \sum_{j=1}^{N_g} p(i)p(j)(i - j)^2 \right) \left( \frac{1}{N_v} \sum_{i=1}^{N_g} s(i) \right)$$

### **152. Busyness**

$$busyness = \frac{\sum_{i=1}^{N_g} p(i)s(i)}{\sum_{i=1}^{N_g} \sum_{j=1}^{N_g} |ip(i) - jp(j)|}, \quad p(i) \neq 0, \quad p(j) \neq 0$$

### **153. Complexity**

$$complexity = \frac{1}{N_v} \sum_{i=1}^{N_g} \sum_{j=1}^{N_g} |i - j| \frac{p(i)s(i) + p(j)s(j)}{p(i) + p(j)}, \quad p(i) \neq 0, \quad p(j) \neq 0$$

### **154. Strength**

$$strength = \frac{\sum_{i=1}^{N_g} \sum_{j=1}^{N_g} [p(i) + p(j)](i - j)^2}{\varepsilon + \sum_{i=1}^{N_g} s(i)}, \quad p(i) \neq 0, \quad p(j) \neq 0$$

## **Neighboring gray level dependence matrix based features (NGLDM)**

NGLDM features are invariant under spatial rotation. The  $(i, j)$ th entry of the NGLDM  $p(i, j|d, a)$  describes the number of neighborhoods with center voxel gray-level (i.e. intensity value)  $i$  and dependence (i.e. number of dependent voxels)  $k = j - 1$ . A neighborhood are all voxels within a distance  $d$  from the center voxel. The center voxel and a neighboring voxel are dependent if their absolute gray value difference  $\leq a$ , the dependency coarseness parameter. T

Let:

$p(i, j)$  be the  $(i, j)$ th entry in the given NGLDM  $p$ , generalized for any  $d$  and  $a$ ,

$N_g$  the number of discrete intensity values in the image,

$N_d$  the maximum dependence value,

$N_s$  the total number of neighborhoods, where  $N_s = \sum_{i=1}^{N_g} \sum_{j=1}^{N_z} p(i, j)$ ,

$p_d$  the sum distribution of the number of neighborhoods with dependence  $j = k + 1$ , where  $p_d(j) = \sum_{i=1}^{N_g} p(i, j)$ ,

$p_g$  the sum distribution of the number of neighborhoods with center voxel gray level  $i$ , where  $p_g(i) = \sum_{j=1}^{N_d} p(i, j)$ ,

$p_n(i, j)$  the normalized NGLDM, where  $p_n(i, j) = \frac{p(i, j)}{N_s}$ ,

$\mu_d$  the mean dependence, where  $\mu_r = \sum_{i=1}^{N_g} \sum_{j=1}^{N_z} j p_n(i, j|\theta)$ ,

$\mu_g$  the mean gray level, where  $\mu_g = \sum_{i=1}^{N_g} \sum_{j=1}^{N_z} i p_n(i, j|\theta)$ .

Note: By definition, the number of voxels in the image ( $N_p$ ) equals the total number of neighborhoods ( $N_s$ ), since in our implementation every voxel is considered to have a neighborhood. Feature “dependence percentage”  $\left(\frac{N_s}{N_p}\right)$ , which is the equivalent to run-length feature “run percentage” (RP;

70), is therefore omitted, because it will always evaluate to 1.

**155. Small Dependence Emphasis (SDE)**

$$SDE = \frac{1}{N_s} \sum_{j=1}^{N_d} \frac{p_d}{j^2}$$

This feature is also called Small Number Emphasis.

**156. Large Dependence Emphasis (LDE)**

$$LDE = \frac{1}{N_s} \sum_{j=1}^{N_d} j^2 p_d$$

This feature is also called Large Number Emphasis.

**157. Gray-level Non-Uniformity (GLN)**

$$GLN = \frac{1}{N_s} \sum_{i=1}^{N_g} p_g^2$$

**158. Gray-level Non-Uniformity Normalized (GLNN)**

$$GLNN = \frac{1}{N_s^2} \sum_{i=1}^{N_g} p_g^2$$

**159. Dependence Non-Uniformity (DN)**

$$DN = \frac{1}{N_s} \sum_{j=1}^{N_d} p_z^2$$

This feature is also called Number Nonuniformity.

**160. Dependence Non-Uniformity Normalized (DNN)**

$$DNN = \frac{1}{N_s^2} \sum_{j=1}^{N_z} p_z^2$$

**161. Low Gray-level Emphasis (LGE)**

$$LGE = \frac{1}{N_s} \sum_{i=1}^{N_g} \frac{p_g}{i^2}$$

**162. High Gray-level Emphasis (HGE)**

$$HGE = \frac{1}{N_s} \sum_{i=1}^{N_g} i^2 p_g$$

**163. Low Gray-level small Dependence Emphasis (LGSDE)**

$$LGSDE = \frac{1}{N_s} \sum_{i=1}^{N_g} \sum_{j=1}^{N_d} \frac{p(i,j)}{i^2 j^2}$$

**164. High Gray-level small Dependence Emphasis (HGSDE)**

$$HGSDE = \frac{1}{N_s} \sum_{i=1}^{N_g} \sum_{j=1}^{N_d} \frac{p(i,j) i^2}{j^2}$$

**165. Low Gray-level large Dependence Emphasis (LGLDE)**

$$LGLDE = \frac{1}{N_s} \sum_{i=1}^{N_g} \sum_{j=1}^{N_d} \frac{p(i,j) j^2}{i^2}$$

**166. High Gray-level large Dependence Emphasis (HGLDE)**

$$HGLDE = \frac{1}{N_s} \sum_{i=1}^{N_g} \sum_{j=1}^{N_d} p(i,j) i^2 j^2$$

**167. Gray-level variance (GLV)**

$$GLV = \sum_{i=1}^{N_g} \sum_{j=1}^{N_d} (i - \mu_g)^2 p_n(i,j)$$

**168. Dependence variance (DV)**

$$DV = \sum_{i=1}^{N_g} \sum_{j=1}^{N_d} (j - \mu_d)^2 p_n(i,j)$$

**169. Dependence entropy (DE), also called Entropy**

$$DE = - \sum_{i=1}^{N_g} \sum_{j=1}^{N_d} p_n(i,j) \log_2 [p_n(i,j)]$$

170. Second moment (SM)

$$SM = \frac{\sum_{i=1}^{N_g} \sum_{j=1}^{N_d} p(i,j)^2}{}$$

## Filtered features

### *Wavelet features*

Wavelet transform effectively decouples textural information by decomposing the original image, in a similar manner as Fourier analysis, in low- and high-frequencies. A (undecimated) three dimensional wavelet transform decomposes the original image  $X$  into 8 decompositions. Consider  $L$  and  $H$  to be a low-pass (i.e. a scaling) and, respectively, a high-pass (i.e. a wavelet) function, and the wavelet decompositions of  $X$  to be labeled as  $X_{LLL}$ ,  $X_{LLH}$ ,  $X_{LHL}$ ,  $X_{LHH}$ ,  $X_{HLL}$ ,  $X_{HLH}$ ,  $X_{HHL}$  and  $X_{HHH}$ . For example,  $X_{LLH}$  is then interpreted as the high-pass sub band, resulting from directional filtering of  $X$  with a low-pass filter along x-direction, a low pass filter along y-direction and a high-pass filter along z-direction and is constructed as:

$$X_{LLH}(i, j, k) = \sum_{p=1}^{N_L} \sum_{q=1}^{N_L} \sum_{r=1}^{N_H} L(p)L(q)H(r)X(i + p, j + q, k + r)$$

Where  $N_L$  is the length of filter  $L$  and  $N_H$  is the length of filter  $H$ . The other decompositions are constructed in a similar manner, applying their respective ordering of low or high-pass filtering in x, y and z-direction. If the applied wavelet decomposition is undecimated, the size of each decomposition is equal to the original image and each decomposition is shift invariant. Because of these properties, original (tumor) segmentations can be applied directly to the decompositions after wavelet transform.

## ***Laplacian of Gaussian features***

The Laplacian of an image brings out areas of rapid intensity change and is usually used for edge detection. A Gaussian filter is applied prior to the Laplacian to smooth the image and reduce noise.

Textural properties representing features of different degrees of coarseness can then be calculated.

The equation of a Laplacian of Gaussian (LoG) with a 2D kernel:

$$\text{LoG}(x, y) = -\frac{1}{\pi\sigma^4} \left[ 1 - \frac{x^2 + y^2}{2\sigma^2} \right] e^{-\frac{x^2 + y^2}{2\sigma^2}}$$

Texture size (fine to coarse) is highlighted by modifying the Gaussian radius parameter  $\sigma$  (e.g., from 0.5 mm to 5mm, with 0.5 mm increments). Each value of  $\sigma$  provides a filtered image. For instance first-order gray-level statistics (described earlier) can be determined for each filtered image, as well as for only the positive part of each filtered image.
